# Supplementary material for: Determination of derived volumetric properties and heat capacities at high pressures using two density scaling based equations of state. Application to dipentaerythritol hexa(3,5,5-trimethylhexanoate)
Source: Royal Society of Chemistry journal article supplement (doi:10.1039/c7cp07180a), 2018-01-01
Supplement: c7cp07180a1.pdf [file c7cp07180a1.pdf]

**Determination of derived volumetric properties and heat capacities at high pressures using two density scaling based equations of state. Application to dipentaerythritol hexa(3,5,5-trimethylhexanoate)**

*E.R. López,<sup>a</sup> O. Fandiño,<sup>a,b</sup> D. Cabaleiro,<sup>c</sup> L. Lugo,<sup>a,c</sup> J. Fernández<sup>a</sup>*

*<sup>a</sup>Laboratorio de Propiedades Termofísicas, Grupo NaFoMat, Departamento de Física Aplicada, Universidade de Santiago de Compostela, E-15782*

*Santiago de Compostela, Spain*

*<sup>b</sup>Dept. Chemistry, University of Guelph, Guelph, ON N1G 2W1, Canada*

*<sup>c</sup>Departamento de Física Aplicada, Facultade de Ciencias, Universidade de Vigo, E-36310 Vigo, Spain*

**SUPPLEMENTARY INFORMATION**

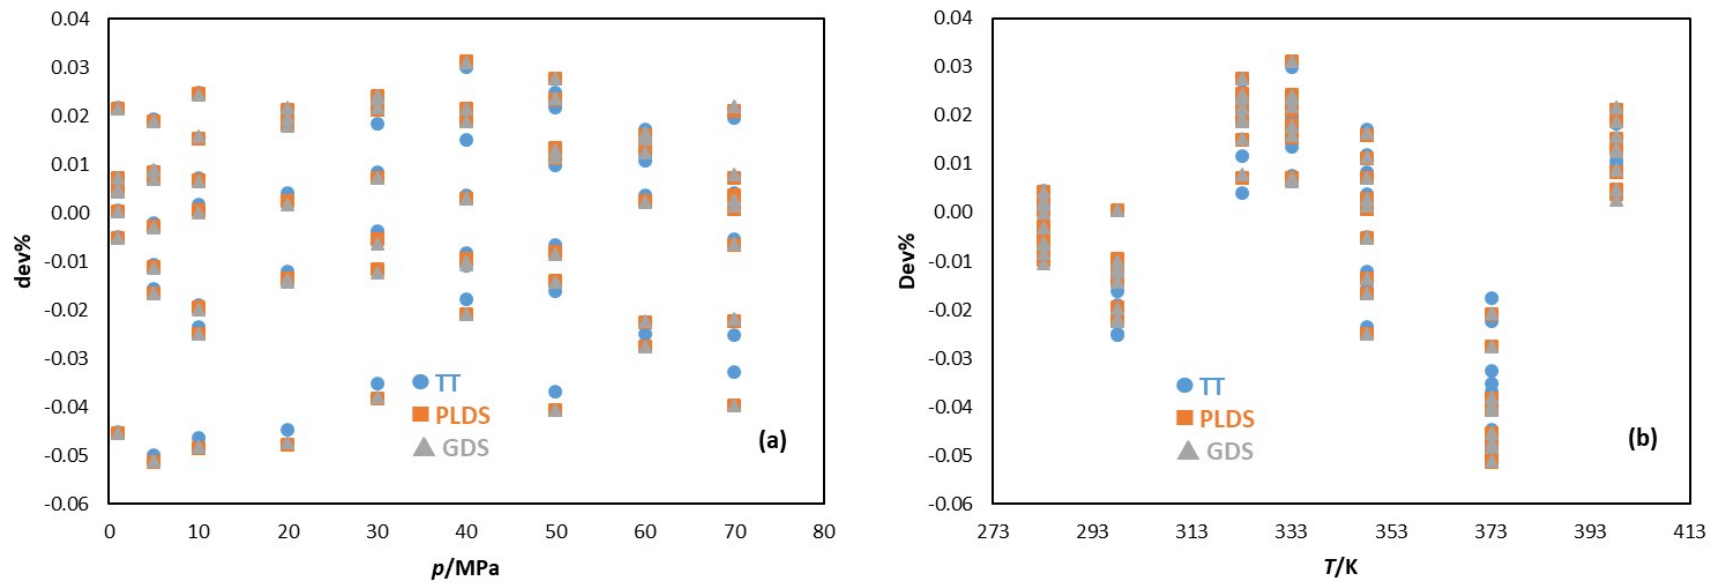

**Fig. 1.** Deviations between the densities reported in Table 1 and those obtained from the EoS. (a) versus pressure and (b) versus temperature

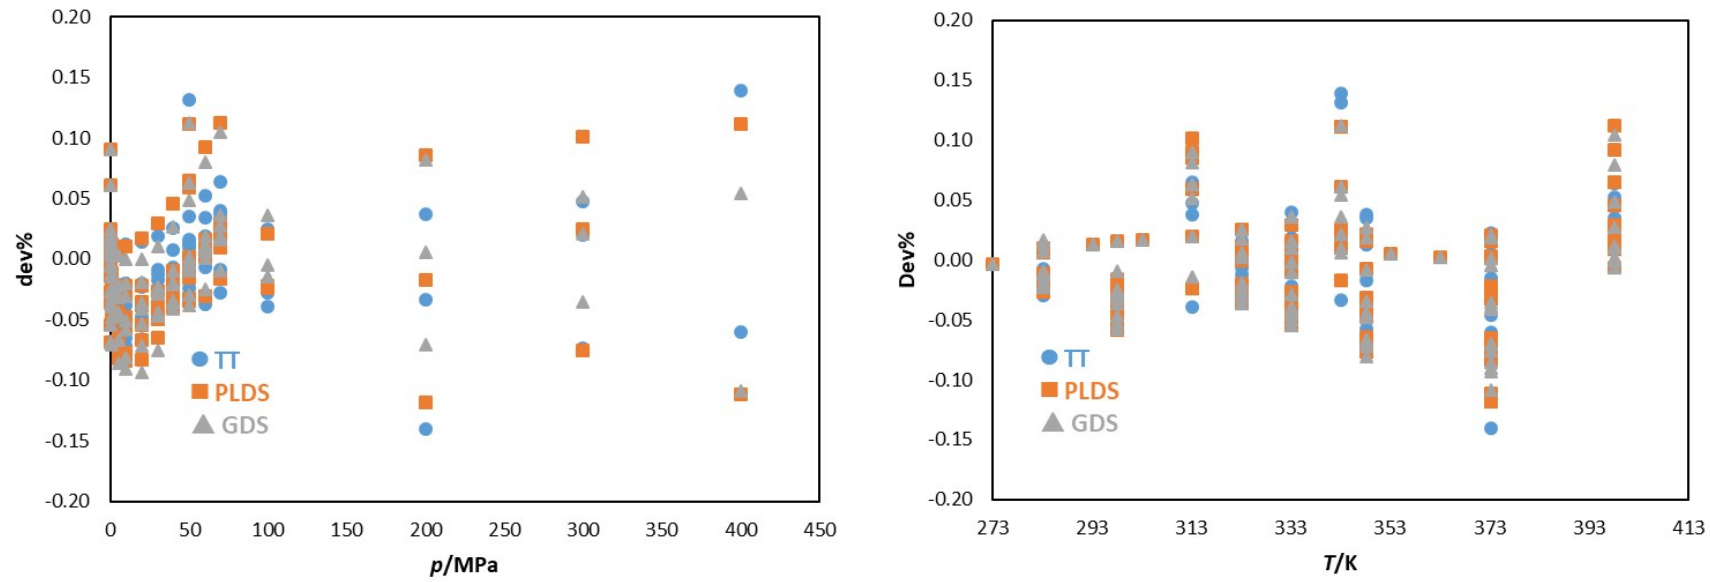

**Fig. 2.** Deviations between the densities from the database and those obtained from the EoS. (a) versus pressure and (b) versus temperature

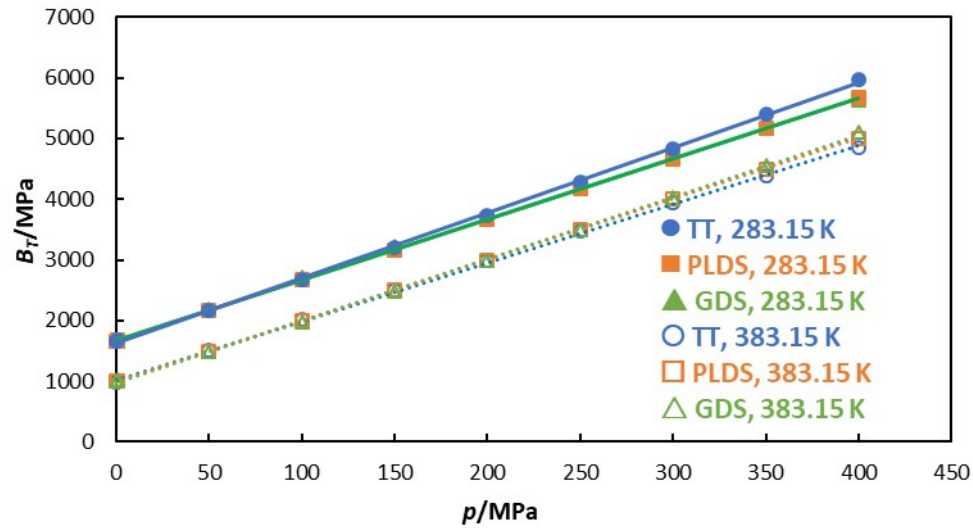

**Fig. 3.** Bulk modulus versus pressure at two different temperatures, 283.15 K (filled symbols) and 383.15 K (unfilled symbols) obtained from TT equation, eqn (20), PLDS equation, eqn (7) and GDS equation, eqn (18)).

**Table 1.**  $10^{10} \kappa_T/\text{Pa}^{-1}$  from TT equation, Eqn (20). Global fit

| $\rho/\text{MPa}$ | $T/\text{K}$ |        |        |        |        |        |        |        |        |        |        |        |
|-------------------|--------------|--------|--------|--------|--------|--------|--------|--------|--------|--------|--------|--------|
|                   | 283.15       | 293.15 | 303.15 | 313.15 | 323.15 | 333.15 | 343.15 | 353.15 | 363.15 | 373.15 | 383.15 | 398.15 |
| 1                 | 6.00         | 6.32   | 6.67   | 7.04   | 7.42   | 7.82   | 8.25   | 8.68   | 9.13   | 9.60   | 10.06  | 10.76  |
| 50                | 4.57         | 4.76   | 4.95   | 5.15   | 5.36   | 5.57   | 5.78   | 5.99   | 6.21   | 6.42   | 6.63   | 6.93   |
| 100               | 3.70         | 3.82   | 3.95   | 4.07   | 4.20   | 4.33   | 4.46   | 4.59   | 4.72   | 4.84   | 4.96   | 5.13   |
| 150               | 3.11         | 3.20   | 3.29   | 3.38   | 3.47   | 3.56   | 3.65   | 3.74   | 3.82   | 3.90   | 3.98   | 4.10   |
| 200               | 2.69         | 2.76   | 2.83   | 2.90   | 2.96   | 3.03   | 3.10   | 3.16   | 3.22   | 3.28   | 3.34   | 3.42   |
| 250               | 2.38         | 2.43   | 2.49   | 2.54   | 2.59   | 2.64   | 2.69   | 2.74   | 2.79   | 2.84   | 2.89   | 2.95   |
| 300               | 2.13         | 2.18   | 2.22   | 2.26   | 2.31   | 2.35   | 2.39   | 2.43   | 2.47   | 2.51   | 2.54   | 2.59   |
| 350               | 1.94         | 1.97   | 2.01   | 2.04   | 2.08   | 2.12   | 2.15   | 2.18   | 2.22   | 2.25   | 2.28   | 2.32   |

**Table 2.**  $10^{10} \kappa_T/\text{Pa}^{-1}$  from PLDS equation, Eqn (7). Global fit

| $\rho/\text{MPa}$ | $T/\text{K}$ |        |        |        |        |        |        |        |        |        |        |        |
|-------------------|--------------|--------|--------|--------|--------|--------|--------|--------|--------|--------|--------|--------|
|                   | 283.15       | 293.15 | 303.15 | 313.15 | 323.15 | 333.15 | 343.15 | 353.15 | 363.15 | 373.15 | 383.15 | 398.15 |
| 1                 | 5.97         | 6.28   | 6.61   | 6.95   | 7.32   | 7.70   | 8.10   | 8.52   | 8.97   | 9.44   | 9.93   | 10.72  |
| 50                | 4.62         | 4.80   | 4.99   | 5.19   | 5.38   | 5.59   | 5.80   | 6.01   | 6.23   | 6.45   | 6.68   | 7.02   |
| 100               | 3.75         | 3.87   | 3.99   | 4.12   | 4.24   | 4.37   | 4.49   | 4.62   | 4.75   | 4.88   | 5.01   | 5.20   |
| 150               | 3.16         | 3.24   | 3.33   | 3.41   | 3.50   | 3.58   | 3.67   | 3.75   | 3.84   | 3.92   | 4.00   | 4.13   |
| 200               | 2.73         | 2.79   | 2.85   | 2.92   | 2.98   | 3.04   | 3.10   | 3.16   | 3.22   | 3.28   | 3.34   | 3.42   |
| 250               | 2.40         | 2.45   | 2.50   | 2.54   | 2.59   | 2.64   | 2.68   | 2.73   | 2.77   | 2.82   | 2.86   | 2.92   |
| 300               | 2.14         | 2.18   | 2.22   | 2.26   | 2.29   | 2.33   | 2.37   | 2.40   | 2.43   | 2.47   | 2.50   | 2.55   |
| 350               | 1.93         | 1.97   | 2.00   | 2.03   | 2.06   | 2.09   | 2.12   | 2.14   | 2.17   | 2.20   | 2.22   | 2.26   |

**Table 3.**  $10^{10} \kappa_T/\text{Pa}^{-1}$  from GDS equation, Eqn (18). Global fit

| $\rho/\text{MPa}$ | $T/\text{K}$ |        |        |        |        |        |        |        |        |        |        |        |
|-------------------|--------------|--------|--------|--------|--------|--------|--------|--------|--------|--------|--------|--------|
|                   | 283.15       | 293.15 | 303.15 | 313.15 | 323.15 | 333.15 | 343.15 | 353.15 | 363.15 | 373.15 | 383.15 | 398.15 |
| 1                 | 5.98         | 6.28   | 6.60   | 6.94   | 7.29   | 7.67   | 8.06   | 8.47   | 8.90   | 9.35   | 9.82   | 10.58  |
| 50                | 4.62         | 4.81   | 5.00   | 5.20   | 5.40   | 5.61   | 5.83   | 6.04   | 6.26   | 6.49   | 6.71   | 7.06   |
| 100               | 3.74         | 3.86   | 3.99   | 4.12   | 4.25   | 4.39   | 4.52   | 4.66   | 4.79   | 4.92   | 5.06   | 5.26   |
| 150               | 3.13         | 3.22   | 3.31   | 3.40   | 3.49   | 3.59   | 3.68   | 3.77   | 3.86   | 3.95   | 4.04   | 4.17   |
| 200               | 2.68         | 2.75   | 2.82   | 2.88   | 2.95   | 3.02   | 3.09   | 3.16   | 3.22   | 3.29   | 3.35   | 3.45   |
| 250               | 2.34         | 2.39   | 2.44   | 2.50   | 2.55   | 2.60   | 2.66   | 2.71   | 2.76   | 2.81   | 2.86   | 2.93   |
| 300               | 2.07         | 2.11   | 2.16   | 2.20   | 2.24   | 2.28   | 2.32   | 2.36   | 2.41   | 2.44   | 2.48   | 2.54   |
| 350               | 1.85         | 1.89   | 1.93   | 1.96   | 1.99   | 2.03   | 2.06   | 2.10   | 2.13   | 2.16   | 2.19   | 2.24   |

**Table 4.**  $10^4 \alpha_p/\text{K}^{-1}$  from TT equation, Eqn (20). Global fit

| $p/\text{MPa}$ | $T/\text{K}$ |        |        |        |        |        |        |        |        |        |
|----------------|--------------|--------|--------|--------|--------|--------|--------|--------|--------|--------|
|                | 293.15       | 303.15 | 313.15 | 323.15 | 333.15 | 343.15 | 353.15 | 363.15 | 373.15 | 383.15 |
| 0.1            | 7.06         | 7.10   | 7.14   | 7.17   | 7.21   | 7.24   | 7.27   | 7.31   | 7.34   | 7.37   |
| 1              | 7.03         | 7.07   | 7.10   | 7.14   | 7.17   | 7.20   | 7.23   | 7.27   | 7.29   | 7.32   |
| 50             | 5.79         | 5.77   | 5.76   | 5.74   | 5.73   | 5.73   | 5.73   | 5.74   | 5.77   | 5.81   |
| 100            | 5.01         | 4.98   | 4.95   | 4.93   | 4.91   | 4.90   | 4.91   | 4.93   | 4.97   | 5.03   |
| 150            | 4.49         | 4.45   | 4.41   | 4.39   | 4.37   | 4.37   | 4.38   | 4.42   | 4.47   | 4.56   |
| 200            | 4.10         | 4.06   | 4.03   | 4.00   | 3.99   | 3.99   | 4.01   | 4.06   | 4.12   | 4.22   |
| 250            | 3.80         | 3.76   | 3.73   | 3.71   | 3.70   | 3.71   | 3.73   | 3.78   | 3.86   | 3.97   |
| 300            | 3.56         | 3.52   | 3.49   | 3.47   | 3.47   | 3.48   | 3.51   | 3.57   | 3.66   | 3.78   |
| 350            | 3.36         | 3.32   | 3.29   | 3.28   | 3.27   | 3.29   | 3.33   | 3.39   | 3.49   | 3.62   |
| 400            | 3.19         | 3.16   | 3.13   | 3.11   | 3.11   | 3.13   | 3.18   | 3.25   | 3.35   | 3.48   |



**Table 5.**  $10^4 \alpha_p/K^{-1}$  from PLDS equation, Eqn (7). Global fit

| <b><math>p/MPa</math></b> | <b><math>T/K</math></b> |        |        |        |        |        |        |        |        |        |
|---------------------------|-------------------------|--------|--------|--------|--------|--------|--------|--------|--------|--------|
|                           | 293.15                  | 303.15 | 313.15 | 323.15 | 333.15 | 343.15 | 353.15 | 363.15 | 373.15 | 383.15 |
| 0.1                       | 7.06                    | 7.10   | 7.14   | 7.17   | 7.21   | 7.24   | 7.27   | 7.31   | 7.34   | 7.37   |
| 1                         | 7.03                    | 7.07   | 7.10   | 7.14   | 7.17   | 7.20   | 7.24   | 7.27   | 7.29   | 7.32   |
| 50                        | 5.83                    | 5.82   | 5.81   | 5.79   | 5.78   | 5.76   | 5.74   | 5.71   | 5.69   | 5.66   |
| 100                       | 5.08                    | 5.05   | 5.03   | 5.00   | 4.97   | 4.94   | 4.91   | 4.87   | 4.84   | 4.80   |
| 150                       | 4.57                    | 4.54   | 4.51   | 4.48   | 4.45   | 4.42   | 4.39   | 4.36   | 4.32   | 4.29   |
| 200                       | 4.20                    | 4.17   | 4.15   | 4.12   | 4.09   | 4.06   | 4.03   | 4.01   | 3.98   | 3.95   |
| 250                       | 3.92                    | 3.90   | 3.87   | 3.85   | 3.83   | 3.80   | 3.78   | 3.75   | 3.73   | 3.70   |
| 300                       | 3.71                    | 3.68   | 3.66   | 3.64   | 3.62   | 3.60   | 3.58   | 3.56   | 3.54   | 3.52   |
| 350                       | 3.53                    | 3.51   | 3.50   | 3.48   | 3.46   | 3.44   | 3.43   | 3.41   | 3.39   | 3.38   |
| 400                       | 3.39                    | 3.37   | 3.36   | 3.35   | 3.33   | 3.32   | 3.30   | 3.29   | 3.28   | 3.26   |

**Table 6.**  $10^4 \alpha_p/K^{-1}$  from GDS equation, Eqn (18). Global fit

| <b><math>p/MPa</math></b> | <b><math>T/K</math></b> |        |        |        |        |        |        |        |        |        |
|---------------------------|-------------------------|--------|--------|--------|--------|--------|--------|--------|--------|--------|
|                           | 293.15                  | 303.15 | 313.15 | 323.15 | 333.15 | 343.15 | 353.15 | 363.15 | 373.15 | 383.15 |
| 0.1                       | 7.06                    | 7.10   | 7.14   | 7.17   | 7.21   | 7.24   | 7.27   | 7.31   | 7.34   | 7.37   |
| 1                         | 7.03                    | 7.07   | 7.11   | 7.14   | 7.17   | 7.21   | 7.24   | 7.27   | 7.30   | 7.32   |
| 50                        | 5.84                    | 5.83   | 5.82   | 5.80   | 5.79   | 5.77   | 5.75   | 5.74   | 5.72   | 5.70   |
| 100                       | 5.06                    | 5.04   | 5.01   | 4.98   | 4.95   | 4.92   | 4.90   | 4.87   | 4.85   | 4.82   |
| 150                       | 4.52                    | 4.49   | 4.46   | 4.43   | 4.40   | 4.37   | 4.34   | 4.32   | 4.30   | 4.28   |
| 200                       | 4.13                    | 4.09   | 4.06   | 4.03   | 4.00   | 3.97   | 3.95   | 3.93   | 3.91   | 3.90   |
| 250                       | 3.82                    | 3.79   | 3.76   | 3.73   | 3.70   | 3.68   | 3.66   | 3.64   | 3.63   | 3.63   |
| 300                       | 3.58                    | 3.55   | 3.52   | 3.49   | 3.47   | 3.45   | 3.43   | 3.42   | 3.41   | 3.41   |
| 350                       | 3.38                    | 3.35   | 3.33   | 3.30   | 3.28   | 3.26   | 3.25   | 3.24   | 3.24   | 3.24   |
| 400                       | 3.22                    | 3.19   | 3.17   | 3.14   | 3.12   | 3.11   | 3.10   | 3.09   | 3.09   | 3.10   |

**Table 7.**  $C_p/J \cdot kg^{-1} \cdot K^{-1}$  from TT equation, Eqn (20). Global fit

| $p/MPa$ | $T/K$  |        |        |        |        |        |        |        |        |        |
|---------|--------|--------|--------|--------|--------|--------|--------|--------|--------|--------|
|         | 293.15 | 303.15 | 313.15 | 323.15 | 333.15 | 343.15 | 353.15 | 363.15 | 373.15 | 383.15 |
| 0.1     | 1910   | 1946   | 1980   | 2012   | 2044   | 2074   | 2102   | 2129   | 2155   | 2180   |
| 1       | 1910   | 1945   | 1980   | 2012   | 2043   | 2073   | 2102   | 2129   | 2155   | 2179   |
| 50      | 1903   | 1939   | 1972   | 2005   | 2035   | 2064   | 2092   | 2117   | 2141   | 2164   |
| 100     | 1903   | 1938   | 1972   | 2003   | 2032   | 2060   | 2085   | 2107   | 2128   | 2146   |
| 150     | 1905   | 1940   | 1973   | 2003   | 2031   | 2056   | 2077   | 2096   | 2112   | 2125   |
| 200     | 1908   | 1943   | 1975   | 2004   | 2029   | 2051   | 2069   | 2084   | 2095   | 2101   |
| 250     | 1912   | 1947   | 1977   | 2004   | 2027   | 2046   | 2061   | 2071   | 2076   | 2076   |
| 300     | 1916   | 1950   | 1979   | 2005   | 2025   | 2041   | 2051   | 2056   | 2056   | 2049   |
| 350     | 1921   | 1953   | 1981   | 2005   | 2023   | 2035   | 2041   | 2041   | 2035   | 2021   |
| 400     | 1925   | 1957   | 1983   | 2004   | 2020   | 2028   | 2031   | 2025   | 2013   | 1992   |

**Table 8.**  $C_p/\text{J}\cdot\text{kg}^{-1}\cdot\text{K}^{-1}$  from PLDS equation, Eqn (7). Global fit

| $p/\text{MPa}$ | $T/\text{K}$ |        |        |        |        |        |        |        |        |        |
|----------------|--------------|--------|--------|--------|--------|--------|--------|--------|--------|--------|
|                | 293.15       | 303.15 | 313.15 | 323.15 | 333.15 | 343.15 | 353.15 | 363.15 | 373.15 | 383.15 |
| 0.1            | 1910         | 1946   | 1980   | 2012   | 2044   | 2074   | 2102   | 2129   | 2155   | 2180   |
| 1              | 1910         | 1945   | 1980   | 2012   | 2043   | 2073   | 2102   | 2129   | 2155   | 2179   |
| 50             | 1902         | 1938   | 1972   | 2005   | 2036   | 2066   | 2095   | 2122   | 2148   | 2173   |
| 100            | 1901         | 1936   | 1971   | 2004   | 2036   | 2066   | 2095   | 2123   | 2149   | 2174   |
| 150            | 1901         | 1937   | 1972   | 2005   | 2037   | 2068   | 2097   | 2125   | 2152   | 2177   |
| 200            | 1902         | 1938   | 1973   | 2007   | 2039   | 2070   | 2099   | 2128   | 2155   | 2180   |
| 250            | 1903         | 1940   | 1975   | 2008   | 2041   | 2072   | 2101   | 2130   | 2157   | 2183   |
| 300            | 1904         | 1941   | 1976   | 2010   | 2042   | 2073   | 2103   | 2131   | 2158   | 2184   |
| 350            | 1905         | 1942   | 1977   | 2011   | 2043   | 2074   | 2104   | 2132   | 2160   | 2185   |
| 400            | 1905         | 1942   | 1977   | 2011   | 2044   | 2075   | 2105   | 2133   | 2160   | 2186   |

**Table 9.**  $C_p/J \cdot kg^{-1} \cdot K^{-1}$  from GDS equation, Eqn (18). Global fit

| $p/MPa$ | $T/K$  |        |        |        |        |        |        |        |        |        |
|---------|--------|--------|--------|--------|--------|--------|--------|--------|--------|--------|
|         | 293.15 | 303.15 | 313.15 | 323.15 | 333.15 | 343.15 | 353.15 | 363.15 | 373.15 | 383.15 |
| 0.1     | 1910   | 1946   | 1980   | 2012   | 2044   | 2074   | 2102   | 2129   | 2155   | 2180   |
| 1       | 1910   | 1945   | 1980   | 2012   | 2043   | 2073   | 2102   | 2129   | 2155   | 2179   |
| 50      | 1902   | 1938   | 1972   | 2005   | 2036   | 2066   | 2094   | 2121   | 2147   | 2172   |
| 100     | 1901   | 1936   | 1971   | 2004   | 2035   | 2065   | 2094   | 2121   | 2146   | 2170   |
| 150     | 1901   | 1938   | 1972   | 2005   | 2036   | 2066   | 2094   | 2121   | 2146   | 2170   |
| 200     | 1903   | 1940   | 1974   | 2007   | 2038   | 2068   | 2096   | 2122   | 2146   | 2168   |
| 250     | 1906   | 1942   | 1977   | 2009   | 2040   | 2069   | 2097   | 2122   | 2145   | 2166   |
| 300     | 1908   | 1945   | 1979   | 2012   | 2042   | 2071   | 2097   | 2122   | 2144   | 2164   |
| 350     | 1911   | 1947   | 1982   | 2014   | 2044   | 2072   | 2098   | 2121   | 2142   | 2160   |
| 400     | 1913   | 1950   | 1984   | 2016   | 2045   | 2073   | 2097   | 2120   | 2139   | 2156   |

**Table 10.**  $10^{10} \kappa_3/\text{Pa}^{-1}$  from TT equation, Eqn (20). Global fit

| $\rho/\text{MPa}$ | $T/\text{K}$ |        |        |        |        |        |        |        |        |        |
|-------------------|--------------|--------|--------|--------|--------|--------|--------|--------|--------|--------|
|                   | 293.15       | 303.15 | 313.15 | 323.15 | 333.15 | 343.15 | 353.15 | 363.15 | 373.15 | 383.15 |
| 1                 | 5.54         | 5.86   | 6.20   | 6.56   | 6.93   | 7.32   | 7.73   | 8.15   | 8.58   | 9.02   |
| 50                | 4.24         | 4.43   | 4.62   | 4.81   | 5.01   | 5.21   | 5.41   | 5.61   | 5.81   | 5.99   |
| 100               | 3.44         | 3.56   | 3.69   | 3.81   | 3.93   | 4.06   | 4.17   | 4.29   | 4.39   | 4.49   |
| 150               | 2.90         | 2.99   | 3.08   | 3.16   | 3.25   | 3.33   | 3.41   | 3.48   | 3.55   | 3.61   |
| 200               | 2.51         | 2.58   | 2.65   | 2.71   | 2.78   | 2.84   | 2.89   | 2.94   | 2.98   | 3.02   |
| 250               | 2.22         | 2.28   | 2.33   | 2.38   | 2.43   | 2.47   | 2.51   | 2.55   | 2.58   | 2.60   |
| 300               | 2.00         | 2.04   | 2.08   | 2.12   | 2.16   | 2.20   | 2.23   | 2.25   | 2.27   | 2.29   |
| 350               | 1.81         | 1.85   | 1.89   | 1.92   | 1.95   | 1.98   | 2.00   | 2.02   | 2.04   | 2.04   |

**Table 11.**  $10^{10} \kappa_3/\text{Pa}^{-1}$  from PLDS equation, Eqn (7). Global fit

| $\rho/\text{MPa}$ | $T/\text{K}$ |        |        |        |        |        |        |        |        |        |
|-------------------|--------------|--------|--------|--------|--------|--------|--------|--------|--------|--------|
|                   | 293.15       | 303.15 | 313.15 | 323.15 | 333.15 | 343.15 | 353.15 | 363.15 | 373.15 | 383.15 |
| 1                 | 5.49         | 5.80   | 6.11   | 6.45   | 6.81   | 7.18   | 7.57   | 7.99   | 8.43   | 8.89   |
| 50                | 4.27         | 4.45   | 4.64   | 4.83   | 5.03   | 5.23   | 5.43   | 5.64   | 5.86   | 6.08   |
| 100               | 3.48         | 3.60   | 3.72   | 3.84   | 3.96   | 4.08   | 4.21   | 4.33   | 4.46   | 4.59   |
| 150               | 2.93         | 3.01   | 3.10   | 3.18   | 3.26   | 3.35   | 3.43   | 3.51   | 3.60   | 3.68   |
| 200               | 2.53         | 2.59   | 2.65   | 2.71   | 2.77   | 2.83   | 2.89   | 2.95   | 3.01   | 3.06   |
| 250               | 2.23         | 2.27   | 2.32   | 2.36   | 2.41   | 2.45   | 2.50   | 2.54   | 2.58   | 2.62   |
| 300               | 1.98         | 2.02   | 2.06   | 2.09   | 2.13   | 2.16   | 2.20   | 2.23   | 2.26   | 2.29   |
| 350               | 1.79         | 1.82   | 1.85   | 1.88   | 1.90   | 1.93   | 1.96   | 1.98   | 2.01   | 2.03   |

**Table 12.**  $10^{10} \kappa_3/\text{Pa}^{-1}$  from GDS equation, Eqn (18). Global fit

| $\rho/\text{MPa}$ | $T/\text{K}$ |        |        |        |        |        |        |        |        |        |
|-------------------|--------------|--------|--------|--------|--------|--------|--------|--------|--------|--------|
|                   | 293.15       | 303.15 | 313.15 | 323.15 | 333.15 | 343.15 | 353.15 | 363.15 | 373.15 | 383.15 |
| 1                 | 5.50         | 5.79   | 6.10   | 6.43   | 6.77   | 7.13   | 7.51   | 7.92   | 8.34   | 8.78   |
| 50                | 4.28         | 4.46   | 4.65   | 4.85   | 5.05   | 5.25   | 5.46   | 5.67   | 5.89   | 6.11   |
| 100               | 3.47         | 3.60   | 3.73   | 3.85   | 3.98   | 4.11   | 4.24   | 4.38   | 4.51   | 4.64   |
| 150               | 2.91         | 3.00   | 3.09   | 3.18   | 3.27   | 3.36   | 3.45   | 3.54   | 3.63   | 3.72   |
| 200               | 2.50         | 2.56   | 2.63   | 2.70   | 2.77   | 2.83   | 2.90   | 2.96   | 3.03   | 3.09   |
| 250               | 2.18         | 2.23   | 2.29   | 2.34   | 2.39   | 2.44   | 2.49   | 2.54   | 2.59   | 2.63   |
| 300               | 1.93         | 1.97   | 2.01   | 2.06   | 2.10   | 2.14   | 2.18   | 2.21   | 2.25   | 2.28   |
| 350               | 1.73         | 1.76   | 1.80   | 1.83   | 1.87   | 1.90   | 1.93   | 1.96   | 1.99   | 2.01   |



**Table 13.**  $u/\text{m}\cdot\text{s}^{-1}$  from TT equation, Eqn (20). Global fit

| $\rho/\text{MPa}$ | $T/\text{K}$ |        |        |        |        |        |        |        |        |        |
|-------------------|--------------|--------|--------|--------|--------|--------|--------|--------|--------|--------|
|                   | 293.15       | 303.15 | 313.15 | 323.15 | 333.15 | 343.15 | 353.15 | 363.15 | 373.15 | 383.15 |
| 1                 | 1367         | 1334   | 1302   | 1270   | 1240   | 1210   | 1182   | 1155   | 1130   | 1107   |
| 50                | 1542         | 1514   | 1486   | 1460   | 1435   | 1411   | 1388   | 1368   | 1348   | 1331   |
| 100               | 1694         | 1669   | 1645   | 1622   | 1600   | 1579   | 1561   | 1544   | 1529   | 1516   |
| 150               | 1829         | 1805   | 1783   | 1762   | 1743   | 1725   | 1709   | 1695   | 1682   | 1673   |
| 200               | 1949         | 1928   | 1907   | 1888   | 1870   | 1854   | 1840   | 1828   | 1818   | 1812   |
| 250               | 2060         | 2039   | 2020   | 2002   | 1986   | 1971   | 1959   | 1949   | 1941   | 1937   |
| 300               | 2161         | 2142   | 2123   | 2107   | 2092   | 2078   | 2067   | 2059   | 2054   | 2052   |
| 350               | 2256         | 2237   | 2220   | 2204   | 2190   | 2178   | 2168   | 2161   | 2158   | 2159   |

**Table 14.**  $u/\text{m}\cdot\text{s}^{-1}$  from PLDS equation, Eqn (7). Global fit

| $\rho/\text{MPa}$ | $T/\text{K}$ |        |        |        |        |        |        |        |        |        |
|-------------------|--------------|--------|--------|--------|--------|--------|--------|--------|--------|--------|
|                   | 293.15       | 303.15 | 313.15 | 323.15 | 333.15 | 343.15 | 353.15 | 363.15 | 373.15 | 383.15 |
| 1                 | 1373         | 1341   | 1311   | 1281   | 1251   | 1223   | 1195   | 1167   | 1141   | 1115   |
| 50                | 1536         | 1509   | 1483   | 1457   | 1433   | 1409   | 1386   | 1364   | 1342   | 1322   |
| 100               | 1684         | 1660   | 1638   | 1615   | 1594   | 1574   | 1554   | 1535   | 1517   | 1500   |
| 150               | 1819         | 1797   | 1777   | 1758   | 1739   | 1721   | 1704   | 1687   | 1672   | 1656   |
| 200               | 1943         | 1923   | 1905   | 1888   | 1871   | 1855   | 1840   | 1825   | 1811   | 1798   |
| 250               | 2058         | 2041   | 2024   | 2008   | 1993   | 1979   | 1965   | 1952   | 1940   | 1928   |
| 300               | 2167         | 2151   | 2136   | 2121   | 2108   | 2095   | 2083   | 2071   | 2060   | 2049   |
| 350               | 2270         | 2255   | 2241   | 2228   | 2216   | 2204   | 2193   | 2183   | 2173   | 2163   |

**Table 15.**  $u/\text{m}\cdot\text{s}^{-1}$  from GDS equation, Eqn (18). Global fit

| $\rho/\text{MPa}$ | $T/\text{K}$ |        |        |        |        |        |        |        |        |        |
|-------------------|--------------|--------|--------|--------|--------|--------|--------|--------|--------|--------|
|                   | 293.15       | 303.15 | 313.15 | 323.15 | 333.15 | 343.15 | 353.15 | 363.15 | 373.15 | 383.15 |
| 1                 | 1373         | 1342   | 1312   | 1283   | 1254   | 1226   | 1199   | 1173   | 1147   | 1122   |
| 50                | 1534         | 1507   | 1480   | 1455   | 1430   | 1406   | 1383   | 1360   | 1339   | 1319   |
| 100               | 1685         | 1660   | 1636   | 1612   | 1590   | 1568   | 1548   | 1528   | 1509   | 1492   |
| 150               | 1825         | 1801   | 1779   | 1757   | 1736   | 1717   | 1698   | 1680   | 1663   | 1647   |
| 200               | 1956         | 1934   | 1913   | 1892   | 1873   | 1854   | 1837   | 1821   | 1805   | 1791   |
| 250               | 2080         | 2059   | 2039   | 2020   | 2001   | 1984   | 1968   | 1952   | 1938   | 1925   |
| 300               | 2199         | 2178   | 2159   | 2141   | 2123   | 2107   | 2092   | 2077   | 2064   | 2052   |
| 350               | 2312         | 2292   | 2274   | 2256   | 2240   | 2224   | 2210   | 2196   | 2184   | 2173   |

**Table 16.**  $10^{10} \kappa_T/\text{Pa}^{-1}$  from TT equation, Eqn (20). Present data fit

| $\rho/\text{MPa}$ | $T/\text{K}$ |        |        |        |        |        |        |        |        |        |        |        |
|-------------------|--------------|--------|--------|--------|--------|--------|--------|--------|--------|--------|--------|--------|
|                   | 283.15       | 293.15 | 303.15 | 313.15 | 323.15 | 333.15 | 343.15 | 353.15 | 363.15 | 373.15 | 383.15 | 398.15 |
| 1                 | 6.08         | 6.40   | 6.73   | 7.09   | 7.46   | 7.86   | 8.28   | 8.72   | 9.18   | 9.67   | 10.17  | 10.96  |
| 5                 | 5.91         | 6.20   | 6.51   | 6.83   | 7.18   | 7.54   | 7.92   | 8.32   | 8.74   | 9.18   | 9.63   | 10.42  |
| 10                | 5.72         | 5.99   | 6.27   | 6.57   | 6.89   | 7.22   | 7.57   | 7.94   | 8.32   | 8.72   | 9.13   | 9.82   |
| 20                | 5.37         | 5.60   | 5.85   | 6.11   | 6.39   | 6.67   | 6.97   | 7.28   | 7.60   | 7.93   | 8.27   | 8.82   |
| 30                | 5.06         | 5.27   | 5.49   | 5.72   | 5.96   | 6.20   | 6.46   | 6.72   | 7.00   | 7.28   | 7.56   | 8.00   |
| 40                | 4.78         | 4.97   | 5.17   | 5.37   | 5.58   | 5.80   | 6.02   | 6.25   | 6.49   | 6.73   | 6.97   | 7.33   |
| 50                | 4.54         | 4.71   | 4.88   | 5.06   | 5.25   | 5.44   | 5.64   | 5.84   | 6.05   | 6.26   | 6.47   | 6.77   |
| 60                | 4.32         | 4.47   | 4.63   | 4.79   | 4.96   | 5.13   | 5.31   | 5.49   | 5.67   | 5.85   | 6.04   | 6.29   |

**Table 17.**  $10^{10} \kappa_T/\text{Pa}^{-1}$  from PLDS equation, Eqn (7). Present data fit

| $\rho/\text{MPa}$ | $T/\text{K}$ |        |        |        |        |        |        |        |        |        |        |        |
|-------------------|--------------|--------|--------|--------|--------|--------|--------|--------|--------|--------|--------|--------|
|                   | 283.15       | 293.15 | 303.15 | 313.15 | 323.15 | 333.15 | 343.15 | 353.15 | 363.15 | 373.15 | 383.15 | 398.15 |
| 1                 | 6.07         | 6.39   | 6.72   | 7.08   | 7.45   | 7.84   | 8.26   | 8.69   | 9.15   | 9.63   | 10.14  | 10.95  |
| 5                 | 5.90         | 6.20   | 6.52   | 6.85   | 7.20   | 7.57   | 7.96   | 8.36   | 8.78   | 9.22   | 9.69   | 10.42  |
| 10                | 5.71         | 5.99   | 6.28   | 6.59   | 6.92   | 7.25   | 7.61   | 7.97   | 8.36   | 8.76   | 9.17   | 9.83   |
| 20                | 5.35         | 5.60   | 5.86   | 6.13   | 6.41   | 6.69   | 6.99   | 7.30   | 7.62   | 7.95   | 8.30   | 8.83   |
| 30                | 5.04         | 5.26   | 5.49   | 5.72   | 5.97   | 6.21   | 6.47   | 6.74   | 7.01   | 7.29   | 7.57   | 8.02   |
| 40                | 4.77         | 4.96   | 5.16   | 5.37   | 5.58   | 5.80   | 6.02   | 6.25   | 6.48   | 6.72   | 6.96   | 7.34   |
| 50                | 4.52         | 4.69   | 4.87   | 5.06   | 5.24   | 5.44   | 5.63   | 5.83   | 6.03   | 6.24   | 6.45   | 6.76   |
| 60                | 4.29         | 4.45   | 4.61   | 4.78   | 4.94   | 5.11   | 5.29   | 5.46   | 5.64   | 5.82   | 6.00   | 6.28   |

**Table 18.**  $10^{10} \kappa_T/\text{Pa}^{-1}$  from GDS equation, Eqn (18). Present data fit

| $\rho/\text{MPa}$ | $T/\text{K}$ |        |        |        |        |        |        |        |        |        |        |        |
|-------------------|--------------|--------|--------|--------|--------|--------|--------|--------|--------|--------|--------|--------|
|                   | 283.15       | 293.15 | 303.15 | 313.15 | 323.15 | 333.15 | 343.15 | 353.15 | 363.15 | 373.15 | 383.15 | 398.15 |
| 1                 | 6.06         | 6.38   | 6.72   | 7.07   | 7.45   | 7.84   | 8.26   | 8.69   | 9.15   | 9.64   | 10.15  | 10.96  |
| 5                 | 5.89         | 6.20   | 6.51   | 6.85   | 7.20   | 7.57   | 7.95   | 8.36   | 8.78   | 9.23   | 9.69   | 10.43  |
| 10                | 5.70         | 5.98   | 6.28   | 6.59   | 6.91   | 7.25   | 7.61   | 7.97   | 8.36   | 8.76   | 9.18   | 9.83   |
| 20                | 5.35         | 5.60   | 5.86   | 6.13   | 6.41   | 6.69   | 6.99   | 7.30   | 7.62   | 7.95   | 8.30   | 8.83   |
| 30                | 5.04         | 5.26   | 5.49   | 5.72   | 5.97   | 6.22   | 6.47   | 6.74   | 7.01   | 7.28   | 7.57   | 8.01   |
| 40                | 4.77         | 4.96   | 5.17   | 5.37   | 5.58   | 5.80   | 6.02   | 6.25   | 6.48   | 6.72   | 6.96   | 7.33   |
| 50                | 4.52         | 4.70   | 4.88   | 5.06   | 5.25   | 5.44   | 5.63   | 5.83   | 6.03   | 6.24   | 6.44   | 6.76   |
| 60                | 4.30         | 4.46   | 4.62   | 4.78   | 4.95   | 5.12   | 5.29   | 5.47   | 5.64   | 5.82   | 6.00   | 6.30   |

**Table 19.**  $10^4 \alpha_p/K^{-1}$  from TT equation, Eqn (20). Present data fit

| <b><math>p/MPa</math></b> | <b><math>T/K</math></b> |        |        |        |        |        |        |        |        |        |
|---------------------------|-------------------------|--------|--------|--------|--------|--------|--------|--------|--------|--------|
|                           | 293.15                  | 303.15 | 313.15 | 323.15 | 333.15 | 343.15 | 353.15 | 363.15 | 373.15 | 383.15 |
| 0.1                       | 6.96                    | 7.03   | 7.09   | 7.15   | 7.21   | 7.27   | 7.33   | 7.39   | 7.44   | 7.49   |
| 1                         | 6.93                    | 7.00   | 7.06   | 7.12   | 7.18   | 7.23   | 7.29   | 7.34   | 7.39   | 7.44   |
| 5                         | 6.81                    | 6.86   | 6.92   | 6.97   | 7.02   | 7.07   | 7.12   | 7.16   | 7.20   | 7.25   |
| 10                        | 6.66                    | 6.71   | 6.75   | 6.80   | 6.84   | 6.88   | 6.92   | 6.95   | 6.99   | 7.03   |
| 20                        | 6.39                    | 6.43   | 6.46   | 6.49   | 6.52   | 6.54   | 6.57   | 6.59   | 6.62   | 6.65   |
| 30                        | 6.16                    | 6.18   | 6.21   | 6.22   | 6.24   | 6.26   | 6.28   | 6.29   | 6.31   | 6.34   |
| 40                        | 5.95                    | 5.97   | 5.98   | 5.99   | 6.00   | 6.01   | 6.02   | 6.04   | 6.05   | 6.07   |
| 50                        | 5.77                    | 5.78   | 5.79   | 5.79   | 5.79   | 5.80   | 5.81   | 5.81   | 5.83   | 5.85   |
| 60                        | 5.60                    | 5.61   | 5.61   | 5.61   | 5.61   | 5.61   | 5.61   | 5.62   | 5.63   | 5.65   |
| 70                        | 5.45                    | 5.45   | 5.45   | 5.45   | 5.44   | 5.44   | 5.44   | 5.45   | 5.46   | 5.48   |

**Table 20.**  $10^4 \alpha_p/\text{K}^{-1}$  from PLDS equation, Eqn (7). Present data fit

| $p/\text{MPa}$ | $T/\text{K}$ |        |        |        |        |        |        |        |        |        |
|----------------|--------------|--------|--------|--------|--------|--------|--------|--------|--------|--------|
|                | 293.15       | 303.15 | 313.15 | 323.15 | 333.15 | 343.15 | 353.15 | 363.15 | 373.15 | 383.15 |
| 0.1            | 6.96         | 7.03   | 7.09   | 7.15   | 7.21   | 7.27   | 7.33   | 7.39   | 7.44   | 7.49   |
| 1              | 6.93         | 7.00   | 7.06   | 7.12   | 7.18   | 7.23   | 7.29   | 7.34   | 7.39   | 7.44   |
| 5              | 6.80         | 6.86   | 6.92   | 6.97   | 7.02   | 7.07   | 7.12   | 7.16   | 7.21   | 7.25   |
| 10             | 6.66         | 6.71   | 6.75   | 6.80   | 6.84   | 6.88   | 6.92   | 6.96   | 6.99   | 7.02   |
| 20             | 6.38         | 6.42   | 6.46   | 6.49   | 6.52   | 6.55   | 6.58   | 6.60   | 6.62   | 6.64   |
| 30             | 6.15         | 6.18   | 6.21   | 6.23   | 6.25   | 6.27   | 6.29   | 6.30   | 6.31   | 6.32   |
| 40             | 5.94         | 5.96   | 5.98   | 6.00   | 6.02   | 6.03   | 6.04   | 6.05   | 6.05   | 6.05   |
| 50             | 5.75         | 5.77   | 5.78   | 5.80   | 5.81   | 5.82   | 5.82   | 5.83   | 5.83   | 5.83   |
| 60             | 5.58         | 5.60   | 5.61   | 5.62   | 5.63   | 5.63   | 5.63   | 5.64   | 5.63   | 5.63   |
| 70             | 5.43         | 5.44   | 5.45   | 5.46   | 5.47   | 5.47   | 5.47   | 5.47   | 5.46   | 5.46   |



**Table 21.**  $10^4 \alpha_p/K^{-1}$  from GDS equation, Eqn (18). Present data fit

| $p/MPa$ | $T/K$  |        |        |        |        |        |        |        |        |        |
|---------|--------|--------|--------|--------|--------|--------|--------|--------|--------|--------|
|         | 293.15 | 303.15 | 313.15 | 323.15 | 333.15 | 343.15 | 353.15 | 363.15 | 373.15 | 383.15 |
| 0.1     | 6.96   | 7.03   | 7.09   | 7.15   | 7.21   | 7.27   | 7.33   | 7.39   | 7.44   | 7.49   |
| 1       | 6.93   | 7.00   | 7.06   | 7.12   | 7.18   | 7.23   | 7.29   | 7.34   | 7.39   | 7.44   |
| 5       | 6.80   | 6.86   | 6.92   | 6.97   | 7.02   | 7.07   | 7.12   | 7.16   | 7.20   | 7.24   |
| 10      | 6.65   | 6.70   | 6.75   | 6.80   | 6.84   | 6.88   | 6.92   | 6.96   | 6.99   | 7.02   |
| 20      | 6.38   | 6.42   | 6.46   | 6.49   | 6.52   | 6.55   | 6.58   | 6.60   | 6.62   | 6.64   |
| 30      | 6.15   | 6.18   | 6.20   | 6.23   | 6.25   | 6.27   | 6.29   | 6.30   | 6.31   | 6.32   |
| 40      | 5.94   | 5.96   | 5.98   | 6.00   | 6.01   | 6.03   | 6.04   | 6.05   | 6.05   | 6.05   |
| 50      | 5.75   | 5.77   | 5.78   | 5.80   | 5.81   | 5.82   | 5.82   | 5.83   | 5.83   | 5.83   |
| 60      | 5.58   | 5.59   | 5.61   | 5.62   | 5.63   | 5.63   | 5.64   | 5.64   | 5.64   | 5.63   |
| 70      | 5.43   | 5.44   | 5.45   | 5.46   | 5.47   | 5.47   | 5.47   | 5.47   | 5.47   | 5.46   |

**Table 22.**  $C_p/J \cdot \text{kg}^{-1} \cdot \text{K}^{-1}$  from TT equation, Eqn (20). Present data fit

| $p/\text{MPa}$ | $T/\text{K}$ |        |        |        |        |        |        |        |        |        |
|----------------|--------------|--------|--------|--------|--------|--------|--------|--------|--------|--------|
|                | 293.15       | 303.15 | 313.15 | 323.15 | 333.15 | 343.15 | 353.15 | 363.15 | 373.15 | 383.15 |
| 0.1            | 1910         | 1946   | 1980   | 2012   | 2044   | 2074   | 2102   | 2129   | 2155   | 2180   |
| 1              | 1910         | 1945   | 1979   | 2012   | 2043   | 2073   | 2102   | 2129   | 2155   | 2179   |
| 5              | 1908         | 1944   | 1978   | 2011   | 2042   | 2072   | 2100   | 2127   | 2153   | 2178   |
| 10             | 1907         | 1942   | 1976   | 2009   | 2040   | 2070   | 2098   | 2126   | 2151   | 2176   |
| 20             | 1904         | 1940   | 1974   | 2006   | 2038   | 2067   | 2096   | 2123   | 2148   | 2172   |
| 30             | 1902         | 1938   | 1972   | 2004   | 2035   | 2065   | 2093   | 2120   | 2145   | 2170   |
| 40             | 1901         | 1936   | 1970   | 2003   | 2034   | 2063   | 2091   | 2118   | 2143   | 2167   |
| 50             | 1899         | 1935   | 1969   | 2001   | 2032   | 2062   | 2090   | 2116   | 2141   | 2165   |
| 60             | 1898         | 1934   | 1968   | 2000   | 2031   | 2060   | 2088   | 2115   | 2139   | 2163   |
| 70             | 1897         | 1933   | 1967   | 1999   | 2030   | 2059   | 2087   | 2113   | 2137   | 2160   |

**Table 23.**  $C_p/J \cdot kg^{-1} \cdot K^{-1}$  from PLDS equation, Eqn (7). Present data fit

| $p/MPa$ | $T/K$  |        |        |        |        |        |        |        |        |        |
|---------|--------|--------|--------|--------|--------|--------|--------|--------|--------|--------|
|         | 293.15 | 303.15 | 313.15 | 323.15 | 333.15 | 343.15 | 353.15 | 363.15 | 373.15 | 383.15 |
| 0.1     | 1910   | 1946   | 1980   | 2012   | 2044   | 2074   | 2102   | 2129   | 2155   | 2180   |
| 1       | 1910   | 1945   | 1979   | 2012   | 2043   | 2073   | 2102   | 2129   | 2155   | 2179   |
| 5       | 1908   | 1944   | 1978   | 2011   | 2042   | 2072   | 2100   | 2127   | 2153   | 2178   |
| 10      | 1907   | 1942   | 1976   | 2009   | 2040   | 2070   | 2098   | 2126   | 2151   | 2176   |
| 20      | 1904   | 1940   | 1974   | 2006   | 2037   | 2067   | 2096   | 2123   | 2148   | 2173   |
| 30      | 1902   | 1937   | 1971   | 2004   | 2035   | 2065   | 2093   | 2120   | 2146   | 2171   |
| 40      | 1900   | 1936   | 1970   | 2002   | 2033   | 2063   | 2092   | 2119   | 2144   | 2169   |
| 50      | 1898   | 1934   | 1968   | 2000   | 2032   | 2061   | 2090   | 2117   | 2143   | 2168   |
| 60      | 1897   | 1932   | 1966   | 1999   | 2030   | 2060   | 2089   | 2116   | 2142   | 2166   |
| 70      | 1896   | 1931   | 1965   | 1998   | 2029   | 2059   | 2088   | 2115   | 2141   | 2165   |

**Table 24.**  $C_p/J \cdot \text{kg}^{-1} \cdot \text{K}^{-1}$  from GDS equation, Eqn (18). Present data fit

| $p/\text{MPa}$ | $T/\text{K}$ |        |        |        |        |        |        |        |        |        |
|----------------|--------------|--------|--------|--------|--------|--------|--------|--------|--------|--------|
|                | 293.15       | 303.15 | 313.15 | 323.15 | 333.15 | 343.15 | 353.15 | 363.15 | 373.15 | 383.15 |
| 0.1            | 1910         | 1946   | 1980   | 2012   | 2044   | 2074   | 2102   | 2129   | 2155   | 2180   |
| 1              | 1910         | 1945   | 1979   | 2012   | 2043   | 2073   | 2102   | 2129   | 2155   | 2179   |
| 5              | 1908         | 1944   | 1978   | 2011   | 2042   | 2072   | 2100   | 2127   | 2153   | 2178   |
| 10             | 1907         | 1942   | 1976   | 2009   | 2040   | 2070   | 2098   | 2126   | 2151   | 2176   |
| 20             | 1904         | 1940   | 1974   | 2006   | 2037   | 2067   | 2096   | 2123   | 2148   | 2173   |
| 30             | 1902         | 1937   | 1971   | 2004   | 2035   | 2065   | 2093   | 2120   | 2146   | 2171   |
| 40             | 1900         | 1936   | 1970   | 2002   | 2033   | 2063   | 2092   | 2119   | 2144   | 2169   |
| 50             | 1898         | 1934   | 1968   | 2000   | 2032   | 2061   | 2090   | 2117   | 2143   | 2168   |
| 60             | 1897         | 1932   | 1966   | 1999   | 2030   | 2060   | 2089   | 2116   | 2142   | 2166   |
| 70             | 1896         | 1931   | 1965   | 1998   | 2029   | 2059   | 2087   | 2115   | 2141   | 2165   |

**Table 25.**  $10^{10} \kappa_3/\text{Pa}^{-1}$  from TT equation, Eqn (20). Present data fit

| $\rho/\text{MPa}$ | $T/\text{K}$ |        |        |        |        |        |        |        |        |        |        |
|-------------------|--------------|--------|--------|--------|--------|--------|--------|--------|--------|--------|--------|
|                   | 283.15       | 293.15 | 303.15 | 313.15 | 323.15 | 333.15 | 343.15 | 353.15 | 363.15 | 373.15 | 383.15 |
| 1                 | 5.35         | 5.63   | 5.94   | 6.26   | 6.60   | 6.96   | 7.35   | 7.75   | 8.18   | 8.63   | 9.09   |
| 5                 | 5.21         | 5.48   | 5.76   | 6.06   | 6.38   | 6.72   | 7.08   | 7.46   | 7.85   | 8.26   | 8.69   |
| 10                | 5.04         | 5.29   | 5.56   | 5.84   | 6.13   | 6.45   | 6.78   | 7.12   | 7.48   | 7.85   | 8.23   |
| 20                | 4.73         | 4.95   | 5.19   | 5.43   | 5.69   | 5.96   | 6.24   | 6.53   | 6.83   | 7.14   | 7.45   |
| 30                | 4.46         | 4.66   | 4.87   | 5.08   | 5.31   | 5.54   | 5.78   | 6.03   | 6.29   | 6.55   | 6.81   |
| 40                | 4.22         | 4.40   | 4.59   | 4.78   | 4.97   | 5.18   | 5.39   | 5.61   | 5.83   | 6.05   | 6.27   |
| 50                | 4.01         | 4.17   | 4.34   | 4.51   | 4.68   | 4.86   | 5.05   | 5.24   | 5.43   | 5.62   | 5.81   |
| 60                | 3.82         | 3.96   | 4.11   | 4.27   | 4.42   | 4.59   | 4.75   | 4.92   | 5.09   | 5.26   | 5.42   |

**Table 26.**  $10^{10} \kappa_3/\text{Pa}^{-1}$  from PLDS equation, Eqn (7). Present data fit

| $\rho/\text{MPa}$ | $T/\text{K}$ |        |        |        |        |        |        |        |        |        |        |
|-------------------|--------------|--------|--------|--------|--------|--------|--------|--------|--------|--------|--------|
|                   | 283.15       | 293.15 | 303.15 | 313.15 | 323.15 | 333.15 | 343.15 | 353.15 | 363.15 | 373.15 | 383.15 |
| 1                 | 5.33         | 5.62   | 5.93   | 6.25   | 6.59   | 6.95   | 7.33   | 7.73   | 8.15   | 8.59   | 9.06   |
| 5                 | 5.19         | 5.47   | 5.76   | 6.06   | 6.38   | 6.72   | 7.07   | 7.44   | 7.83   | 8.24   | 8.67   |
| 10                | 5.03         | 5.29   | 5.56   | 5.84   | 6.14   | 6.45   | 6.77   | 7.11   | 7.46   | 7.84   | 8.22   |
| 20                | 4.73         | 4.96   | 5.20   | 5.44   | 5.70   | 5.96   | 6.24   | 6.53   | 6.82   | 7.13   | 7.45   |
| 30                | 4.47         | 4.67   | 4.88   | 5.09   | 5.32   | 5.55   | 5.79   | 6.03   | 6.28   | 6.55   | 6.81   |
| 40                | 4.23         | 4.41   | 4.60   | 4.79   | 4.98   | 5.18   | 5.39   | 5.60   | 5.82   | 6.04   | 6.27   |
| 50                | 4.02         | 4.18   | 4.34   | 4.51   | 4.69   | 4.86   | 5.05   | 5.23   | 5.42   | 5.61   | 5.81   |
| 60                | 3.82         | 3.97   | 4.12   | 4.27   | 4.42   | 4.58   | 4.74   | 4.91   | 5.07   | 5.24   | 5.41   |

**Table 27.**  $10^{10} \kappa_S/\text{Pa}^{-1}$  from GDS equation, Eqn (18). Present data fit

| $\rho/\text{MPa}$ | $T/\text{K}$ |        |        |        |        |        |        |        |        |        |        |
|-------------------|--------------|--------|--------|--------|--------|--------|--------|--------|--------|--------|--------|
|                   | 283.15       | 293.15 | 303.15 | 313.15 | 323.15 | 333.15 | 343.15 | 353.15 | 363.15 | 373.15 | 383.15 |
| 1                 | 5.33         | 5.62   | 5.92   | 6.25   | 6.59   | 6.95   | 7.33   | 7.73   | 8.15   | 8.60   | 9.07   |
| 5                 | 5.19         | 5.46   | 5.75   | 6.06   | 6.38   | 6.72   | 7.07   | 7.44   | 7.83   | 8.24   | 8.67   |
| 10                | 5.03         | 5.29   | 5.56   | 5.84   | 6.13   | 6.44   | 6.77   | 7.11   | 7.47   | 7.84   | 8.23   |
| 20                | 4.73         | 4.96   | 5.20   | 5.44   | 5.70   | 5.96   | 6.24   | 6.53   | 6.82   | 7.13   | 7.45   |
| 30                | 4.47         | 4.67   | 4.88   | 5.09   | 5.32   | 5.55   | 5.79   | 6.03   | 6.28   | 6.54   | 6.81   |
| 40                | 4.23         | 4.41   | 4.60   | 4.79   | 4.98   | 5.19   | 5.39   | 5.60   | 5.82   | 6.04   | 6.27   |
| 50                | 4.02         | 4.18   | 4.35   | 4.52   | 4.69   | 4.87   | 5.05   | 5.23   | 5.42   | 5.61   | 5.81   |
| 60                | 3.83         | 3.97   | 4.12   | 4.27   | 4.43   | 4.59   | 4.74   | 4.91   | 5.07   | 5.24   | 5.41   |

**Table 28.**  $u/\text{m}\cdot\text{s}^{-1}$  from TT equation, Eqn (20). Present data fit

| $\rho/\text{MPa}$ | $T/\text{K}$ |        |        |        |        |        |        |        |        |        |
|-------------------|--------------|--------|--------|--------|--------|--------|--------|--------|--------|--------|
|                   | 293.15       | 303.15 | 313.15 | 323.15 | 333.15 | 343.15 | 353.15 | 363.15 | 373.15 | 383.15 |
| 1                 | 1356         | 1325   | 1295   | 1266   | 1237   | 1208   | 1180   | 1153   | 1127   | 1102   |
| 5                 | 1373         | 1343   | 1314   | 1285   | 1257   | 1229   | 1202   | 1175   | 1150   | 1125   |
| 10                | 1395         | 1366   | 1337   | 1309   | 1281   | 1254   | 1227   | 1202   | 1177   | 1153   |
| 20                | 1437         | 1409   | 1381   | 1354   | 1328   | 1302   | 1277   | 1253   | 1229   | 1207   |
| 30                | 1478         | 1451   | 1424   | 1398   | 1372   | 1348   | 1324   | 1301   | 1279   | 1258   |
| 40                | 1517         | 1491   | 1465   | 1440   | 1415   | 1391   | 1369   | 1347   | 1326   | 1306   |
| 50                | 1555         | 1529   | 1504   | 1480   | 1456   | 1433   | 1411   | 1390   | 1370   | 1351   |
| 60                | 1591         | 1566   | 1542   | 1519   | 1496   | 1474   | 1453   | 1432   | 1413   | 1395   |



**Table 29.**  $u/\text{m}\cdot\text{s}^{-1}$  from PLDS equation, Eqn (7). Present data fit

| $\rho/\text{MPa}$ | $T/\text{K}$ |        |        |        |        |        |        |        |        |        |
|-------------------|--------------|--------|--------|--------|--------|--------|--------|--------|--------|--------|
|                   | 293.15       | 303.15 | 313.15 | 323.15 | 333.15 | 343.15 | 353.15 | 363.15 | 373.15 | 383.15 |
| 1                 | 1357         | 1326   | 1296   | 1267   | 1238   | 1210   | 1182   | 1156   | 1129   | 1104   |
| 5                 | 1374         | 1344   | 1314   | 1285   | 1257   | 1230   | 1203   | 1177   | 1151   | 1126   |
| 10                | 1395         | 1366   | 1337   | 1308   | 1281   | 1254   | 1228   | 1203   | 1178   | 1154   |
| 20                | 1437         | 1408   | 1380   | 1353   | 1327   | 1302   | 1277   | 1253   | 1229   | 1207   |
| 30                | 1477         | 1449   | 1423   | 1397   | 1372   | 1347   | 1324   | 1301   | 1279   | 1257   |
| 40                | 1515         | 1489   | 1463   | 1439   | 1415   | 1391   | 1369   | 1347   | 1326   | 1306   |
| 50                | 1553         | 1528   | 1503   | 1479   | 1456   | 1434   | 1412   | 1392   | 1371   | 1352   |
| 60                | 1590         | 1565   | 1542   | 1519   | 1496   | 1475   | 1454   | 1435   | 1415   | 1397   |

**Table 30.**  $u/\text{m}\cdot\text{s}^{-1}$  from GDS equation, Eqn (18). Present data fit

| $\rho/\text{MPa}$ | $T/\text{K}$ |        |        |        |        |        |        |        |        |        |
|-------------------|--------------|--------|--------|--------|--------|--------|--------|--------|--------|--------|
|                   | 293.15       | 303.15 | 313.15 | 323.15 | 333.15 | 343.15 | 353.15 | 363.15 | 373.15 | 383.15 |
| 1                 | 1358         | 1327   | 1296   | 1267   | 1238   | 1210   | 1182   | 1155   | 1129   | 1104   |
| 5                 | 1375         | 1344   | 1315   | 1286   | 1257   | 1230   | 1203   | 1177   | 1151   | 1126   |
| 10                | 1396         | 1366   | 1337   | 1309   | 1281   | 1254   | 1228   | 1203   | 1178   | 1154   |
| 20                | 1437         | 1408   | 1380   | 1353   | 1327   | 1302   | 1277   | 1253   | 1229   | 1207   |
| 30                | 1476         | 1449   | 1422   | 1397   | 1372   | 1347   | 1324   | 1301   | 1279   | 1257   |
| 40                | 1515         | 1489   | 1463   | 1438   | 1414   | 1391   | 1369   | 1347   | 1326   | 1306   |
| 50                | 1553         | 1527   | 1503   | 1479   | 1456   | 1434   | 1412   | 1391   | 1372   | 1352   |
| 60                | 1589         | 1565   | 1541   | 1518   | 1496   | 1475   | 1454   | 1434   | 1415   | 1397   |
